# Supplementary material for: Fasting-driven suppression of disease activity in rheumatoid arthritis
Source: Research Square preprint supplement (doi:10.21203/rs.3.rs-6904467/v1), 2025-07-01
Supplement: Supplementary file 1 [file bacd896b09821812c7c5f9d7.docx]

# **Fasting-driven suppression of disease activity in rheumatoid arthritis – Supplementary files**

Bérénice Hansen1*, Rémy Villette1*, Viacheslav Petrov1, Cédric C Laczny1, Farhad Vahid2, Kirsten Roomp1, Etienne Hanslian3,4, Daniela A Koppold3,4, Anika Rajput Khokhar5, Michael Jeitler3,4, Nico Steckhan3,6, Torsten Bohn2, Sebastian Schade7, Brit Mollenhauer7,8, Andreas Michalsen3,4, Jochen G Schneider1,9,10*+, Paul Wilmes1,9*+

1. Luxembourg Centre for Systems Biomedicine, University of Luxembourg, Esch-sur-Alzette, Luxembourg
2. Nutrition and Health Research Group, Department of Precision Health, Luxembourg Institute of Health, 1 A-B, Rue Thomas Edison, 1445 Strassen, Luxembourg
3. Institute for Social Medicine, Epidemiology and Health Economics, Charité Universitätsmedizin Berlin, Berlin, Germany
4. Department of Internal and Integrative Medicine, Immanuel Hospital Berlin-Wannsee Branch, Berlin, Germany
5. Department of Dermatology, Venereology and Allergology, Charité Universitätsmedizin Berlin, Berlin, Germany
6. Digital Health-Connected Healthcare, Hasso Plattner Institute, University of Potsdam, Potsdam, Germany
7. Paracelsus-Elena-Klinik Kassel, Kassel, Germany
8. Department of Neurology, University Medical Center Göttingen, Göttingen, Germany
9. Department of Life Sciences and Medicine, University of Luxembourg, Esch-sur-Alzette, Luxembourg
10. Department of Internal Medicine II, Saarland University Hospital and Saarland University Faculty of Medicine, Homburg, Germany

*Contributed equally

+Corresponding authors:

Jochen G. Schneider,

jochen.schneider@uni.lu,

+352 46 66 44 6154

Paul Wilmes

paul.wilmes@uni.lu

+352 46 66 44 6188

Luxembourg Centre for Systems Biomedicine,

University of Luxembourg, Campus Belval,

7, avenue des Hauts-Fourneaux,

L-4362 Esch-sur-Alzette, Luxembourg

# FIGURES

 
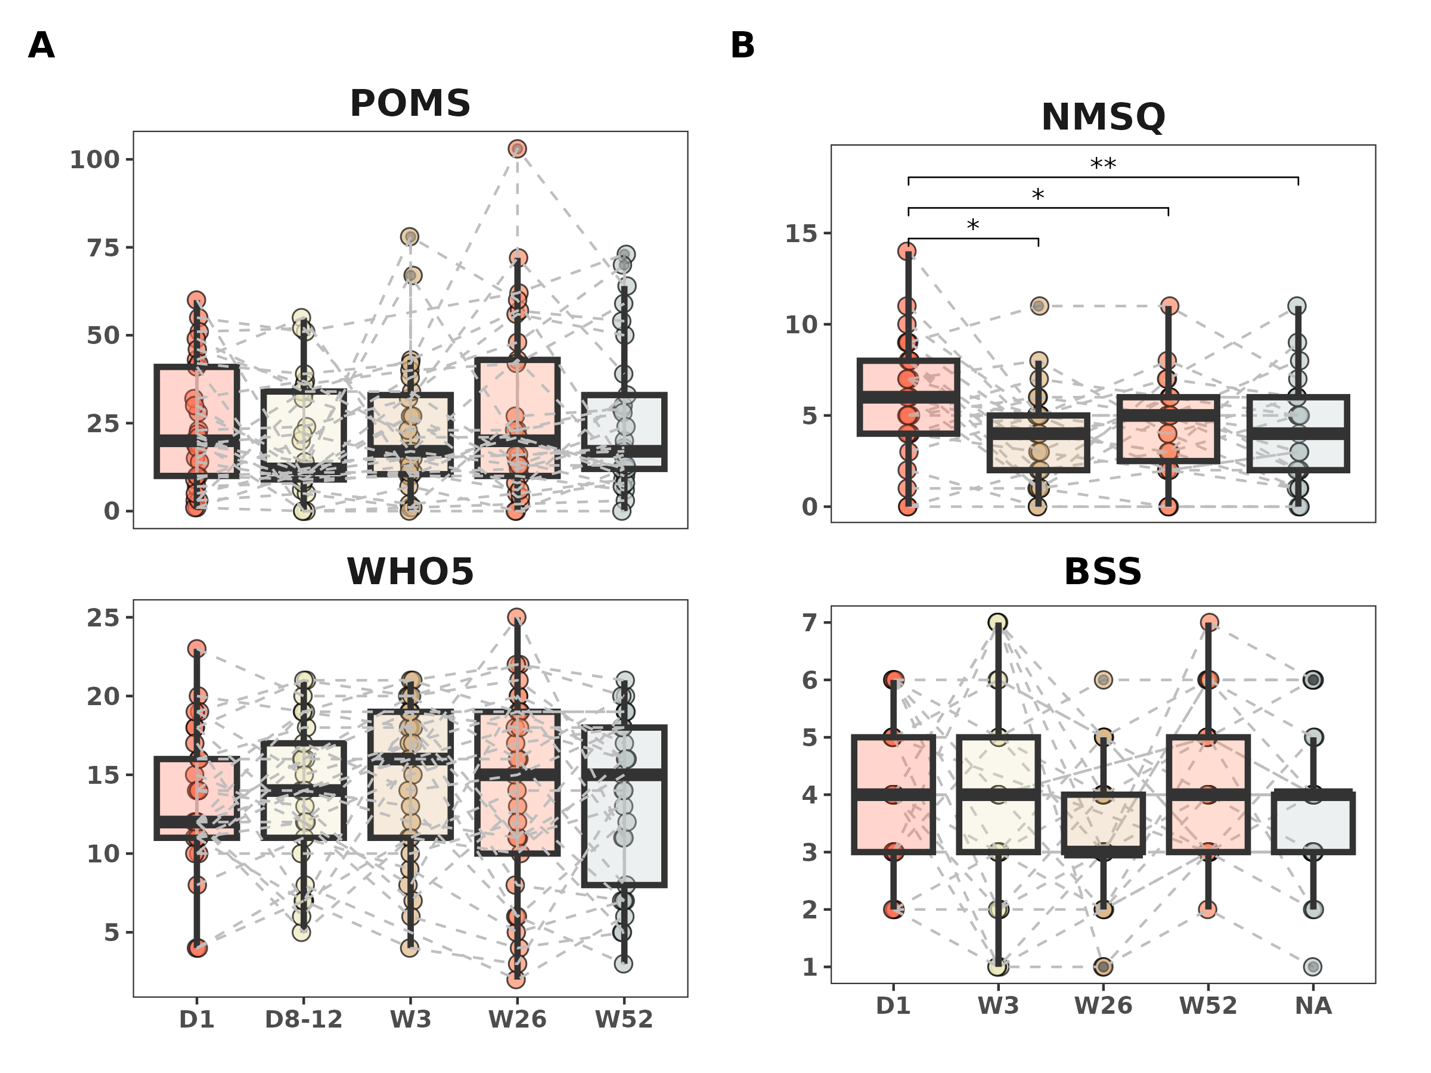


### **Supplementary figure 1. Additional scores measured during the intervention.**

Changes reflected in the answers to the different health questionnaires over time. **A.** Profile moods of states (POMS), Quality-of-Life Questionnaire (WHO-5) and **B.** Non-motor symptoms questionnaire (NMSQ) and Bristol stool scale (BSS). Each dot represents an individual patient, with the dots connected by a dashed line indicating the longitudinal changes observed for the same patient. *P*-values are derived from a paired Wilcoxon test for all timepoints against the baseline (Day 1).  D, Day; W, Week

##
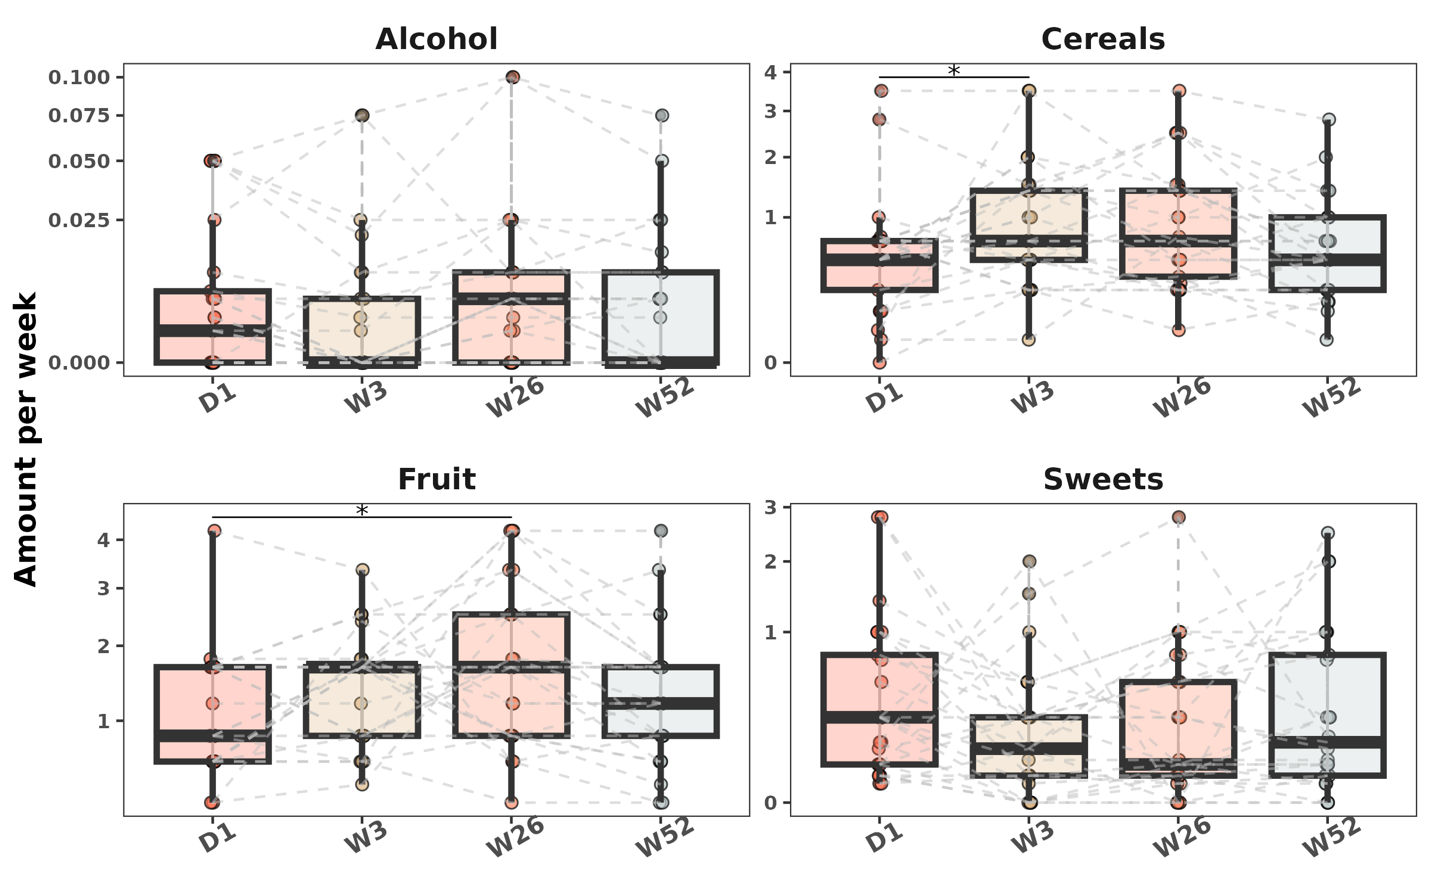


## **Supplementary figure 2. Change of consumption of different food groups during the intervention.**

Consumption of different food groups over the 12 months of the study period. Significant changes can be observed for the consumption of cereals on week 3 (W3) and fruit intake on week 26 (W26). *P*-values are derived from a paired Wilcoxon test for all timepoints against the baseline (Day 1).  D, Day; W, Week


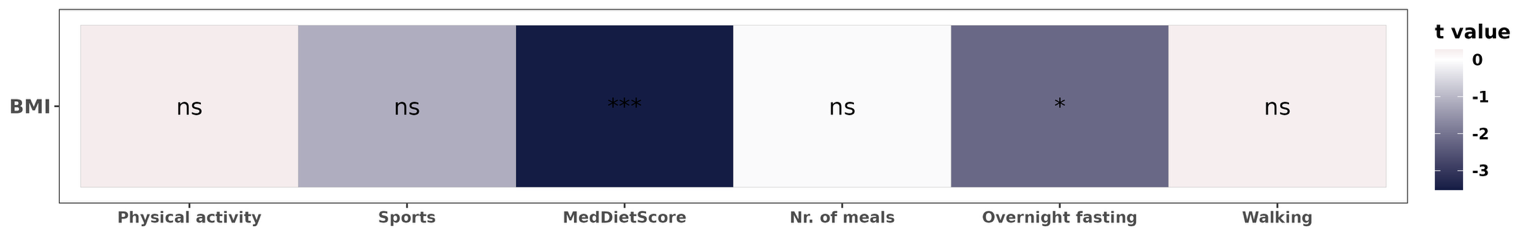


## **Supplementary figure 3. A linear mixed-effects model for assessing the impact of different effects on body mass index.**

The fixed effects include the physical activity, sports, an adherence to a Mediterranean diet (MedDietScore), as well as the duration of the overnight fast and the niumbers of meals. The response variable is the body mass index (BMI). D, Day; W, Week.
